# Supplementary material for: Reprogrammed mesenchymal stem cells derived from iPSCs promote bone repair in steroid-associated osteonecrosis of the femoral head
Source: PubMed Central journal article supplement (PMC7953570; doi:10.1186/s13287-021-02249-1), 2021-03-12
Supplement: 13287_2021_2249_MOESM1_ESM.pdf [file 13287_2021_2249_MOESM1_ESM.pdf]

## Supplementary information

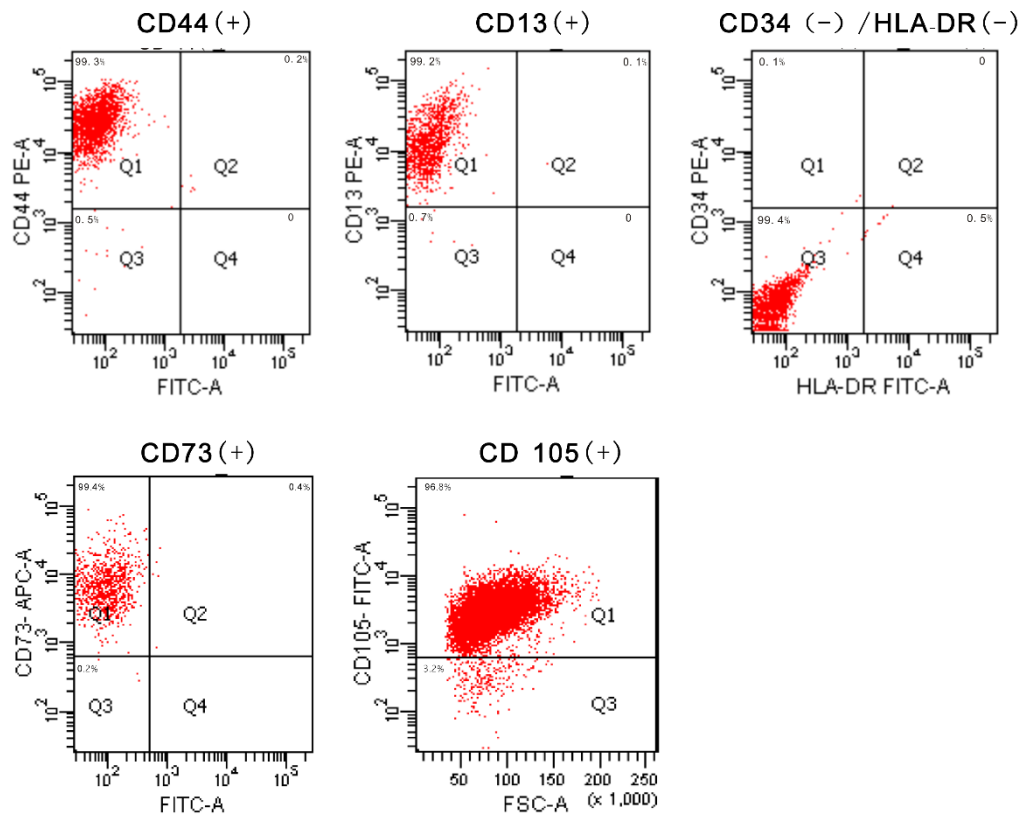

**Figure S1.** Flow cytometric analysis for the cell surface markers of BMSCs at passage 3.

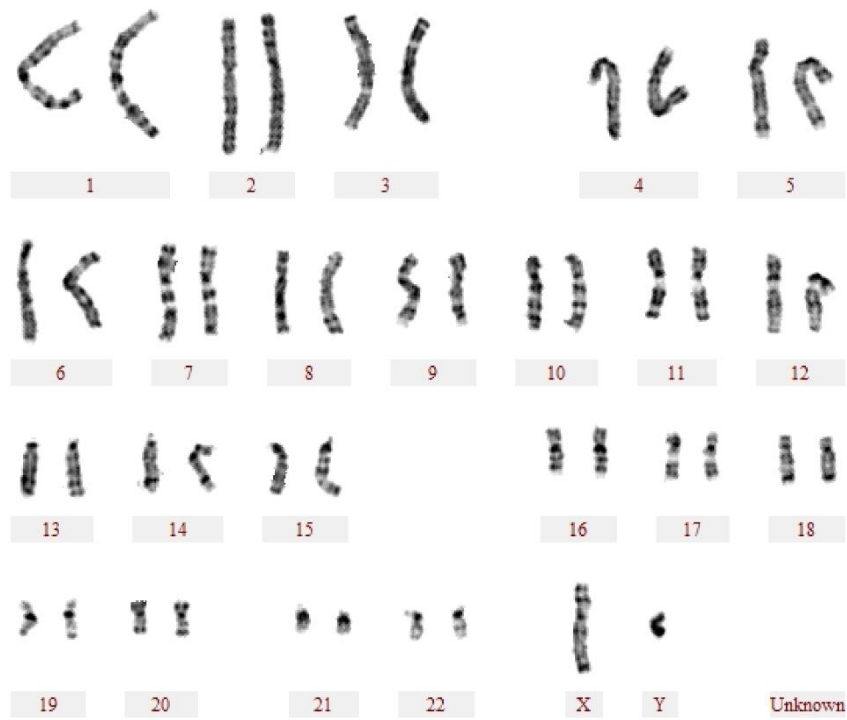

**Figure S2.** Karyotype analysis. The karyotype of iPSC was normal (46, XY) after 37 passages.

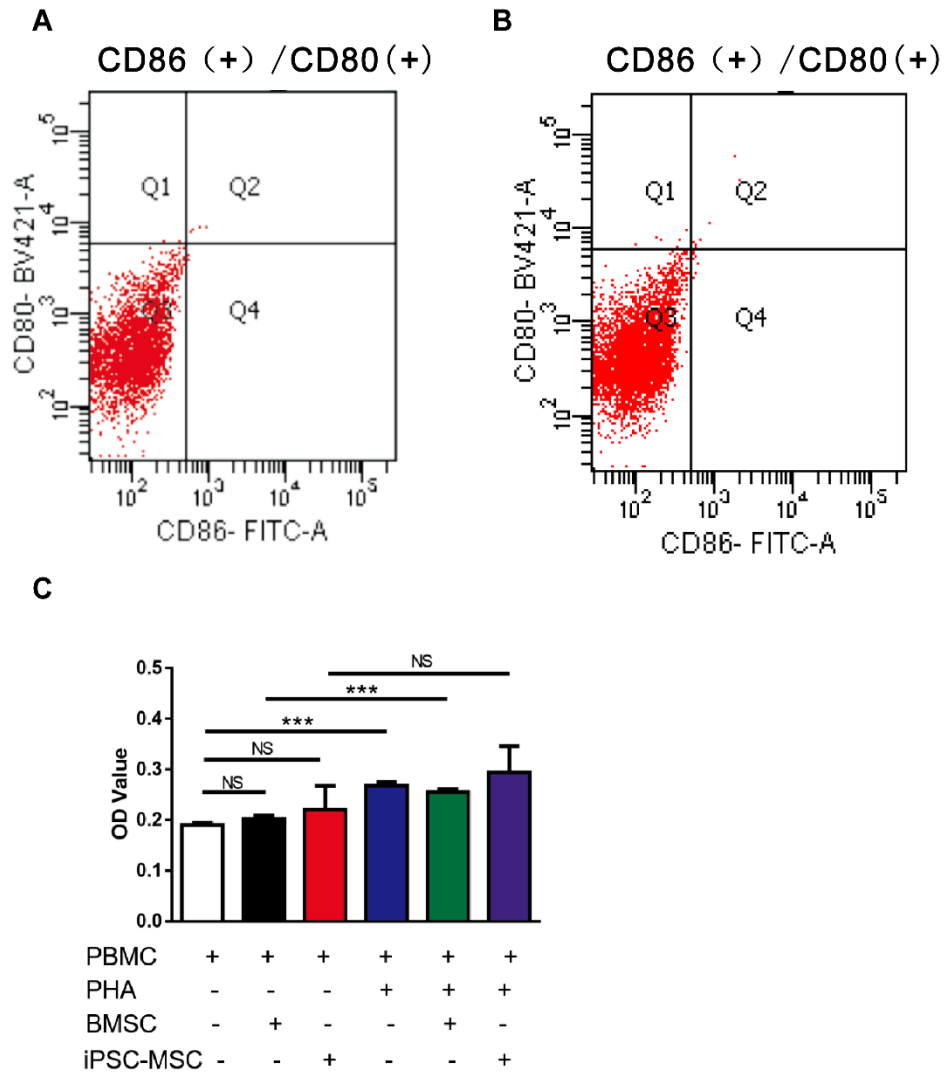

**Figure S3.** The immunogenicity and immunoregulatory function of MSCs. Flow cytometric analysis for immune-related surface molecules (CD80/CD86) of BMSCs (a) and iPSC-MSC (b). c Activity of iPSC-MSCs and BMSCs on the proliferation of stimulated T cells.

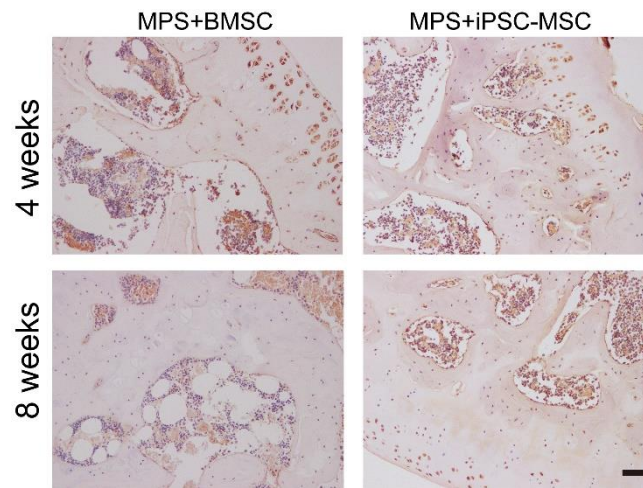

**Figure S4.** Immunohistochemical staining of BrdU at the 4 weeks and 8 weeks after cell implantation. Scale bar indicated 50  $\mu\text{m}$ .

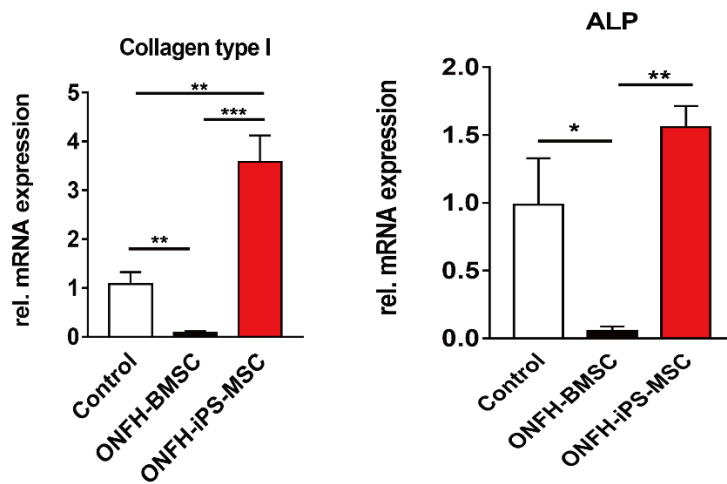

**Figure S5.** Gene expression of osteogenic gene Collagen type I and ALP after two weeks of osteogenic induction. For each gene, expression levels were normalized to the control group,  $n = 4$  per group. All data are presented as mean  $\pm$  SEM. One-way ANOVA with Tukey's adjustment (\*,  $p < 0.05$ ; \*\*,  $p < 0.01$ ; \*\*\*,  $p < 0.001$ ).

**Table S1****Clinical characteristics of recruited patients**

| Characteristics                      | Control (n=12) | ONFH (n=16) |
|--------------------------------------|----------------|-------------|
| Age (year)                           | 59.3±11.9      | 45.1±14.6   |
| Gender (male/female)                 | 8/4            | 9/7         |
| Body mass index (kg/m <sup>2</sup> ) | 20.2 ± 2.4     | 24.1 ± 2.9  |
| Hypertension                         | 1 (8.3%)       | 3 (18.8%)   |
| Hyperlipidemia                       | 1 (8.3%)       | 4 (25%)     |
| Smoker                               | 8 (66.7%)      | 10 (62.5%)  |
| Alcoholism                           | 6 (50%)        | 6 (50%)     |
| GC medication                        | 0              | 4 (25%)     |

Control: femoral neck fractures; ONFH: osteonecrosis of the femoral head; GC: glucocorticoid;

**Table S2****Sequence of RT-qPCR primers**

| Genes         |         | Primer sequence (5'-3') | Product size (bp) |
|---------------|---------|-------------------------|-------------------|
| GAPDH         | Forward | GAGTCAACGGATTTGGTCGT    | 185               |
|               | Reverse | GACAAGCTTCCCGTTCTCAG    |                   |
| Runx 2        | Forward | CGCATTCCTCATCCCAGTAT    | 118               |
|               | Reverse | GCCTGGGGTCTGTAATCTGA    |                   |
| OSX           | Forward | ACCCAACATCAAGCAGAACC    | 120               |
|               | Reverse | TTCAACTTCCCAGGCTCACT    |                   |
| PPAR $\gamma$ | Forward | CGAGAAGGAGAAGCTGTTGG    | 122               |
|               | Reverse | TCAGCGGGAAGGACTTTATG    |                   |
